# Supplementary material for: Health figures: an open source JavaScript library for health data visualization
Source: BMC Med Inform Decis Mak. 2016 Mar 22;16:38. doi: 10.1186/s12911-016-0275-6 (PMC4802654; doi:10.1186/s12911-016-0275-6)
Supplement: Additional file 1 — Nielsen’s Heuristic evaluation. The data contains the results form Nielsen’s Heuristic Evaluation conducted by three usability experts. (CSV 116 kb) [file 12911_2016_275_MOESM1_ESM.csv]

Code	Q_1	Q_2	Q_3	Q_4	Q_5	Q_6	Q_7	Q_8	Q_9	Q_10
4	7	7	4	7	7	6	7	7	7	6
6	7	6	5	6	5	7	6	6	6	7
5	7	6	5	7	6	6	7	6	6	7
